# Supplementary material for: A positively charged trinuclear 3N-chelated monofunctional platinum complex with high DNA affinity and potent cytotoxicity
Source: Royal Society of Chemistry journal article supplement (doi:10.1039/b601739h), 2006-01-01
Supplement: b601739h.pdf [file b601739h.pdf]

**A Positively Charged Trinuclear 3N-chelated  
Monofunctional Platinum Complex With High DNA Affinity  
and Potent Cytotoxicity**

**Experimental section**

**List of Supporting Figures:**

NMR Data of HPTAB

ESMS Spectra of Complex **1**

Time dependent of UV-vis Spectra of the Reaction of **1** and DNA

Fluorescence spectra of the Reaction of **1** and DNA

Electrophoresis in agarose gel of pUC19 plasmid DNA incubated with cisplatin

**Crystallographic Data of  $[\text{Pt}_3(\text{HPTAB})\text{Cl}_3][\text{PtCl}_3(\text{DMSO})](\text{ClO}_4)_2 \cdot \text{DMSO} \cdot \text{C}_3\text{H}_6\text{O} \cdot \text{CH}_3\text{OH} \cdot \text{H}_2\text{O}$**

## Experimental section

$[\text{Pt}_3(\text{HPTAB})\text{Cl}_3](\text{ClO}_4)_3$  (**1**)

0.633g of  $\text{Pt}(\text{DMSO})_2\text{Cl}_2$  (1.5mmol) was added to a solution of ligand of HPTAB (0.355g, 0.5mmol,) in methanol (15mL). The resulting solution was stirred at room temperature for three days, and then the solids were collected by centrifugation and washed with methanol and diethyl ether. The dried solid redissolved in DMSO containing a few drops of methanol was mixed with saturated  $\text{NaClO}_4$  solution of DMSO and a clear solution was obtained. Pale yellow powder was obtained by diffusion of acetone into the solution and identified as complex **1**. Anal. (%) Calcd. for  $\text{C}_{45}\text{H}_{45}\text{Cl}_6\text{Pt}_3\text{N}_9\text{O}_{12}$ : C, 31.74; H, 2.64; N, 7.40. Found: C, 31.68; H, 2.57; N, 7.56. ES-MS:  $m/z = 468.3$   $[\text{Pt}_3(\text{HPTAB})\text{Cl}_3]^{3+}$ ,  $719.8$   $[\text{Pt}_3(\text{HPTAB})\text{Cl}_4]^{2+}$ ,  $1474.3$   $[\text{Pt}_3(\text{HPTAB})\text{Cl}_5]^+$ .  $^1\text{H NMR}$  (500MHz, DMSO- $d_6$ /TMS)  $\delta$ (ppm) 8.69 (d, 6H,), 8.23 (t, 6H), 7.87 (d,6H), 7.83 (m,3H), 7.61 (t,6H), 5.37 (d,6H), 4.76 (d,6H), 4.19 (m,6H).

Meanwhile, the small amounts of yellow crystals **2** suitable for X-Ray structure analysis were achieved at the same time and mechanically separated from the above pale yellow powder **1**. Structure analysis demonstrated it was quite similar to **1** and possessing the formula of  $[\text{Pt}_3(\text{HPTAB})\text{Cl}_3][\text{PtCl}_3(\text{DMSO})](\text{ClO}_4)_2 \cdot \text{DMSO} \cdot \text{C}_3\text{H}_6\text{O} \cdot \text{CH}_3\text{OH} \cdot \text{H}_2\text{O}$ . Its ESMS spectrum was identical to that of **1**.

### NMR spectra of **L**

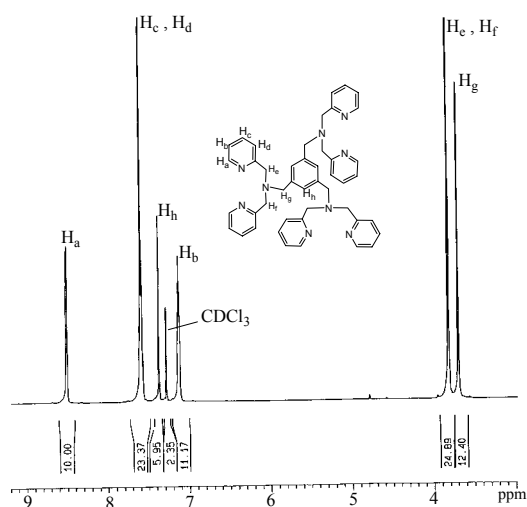

**Figure S1.** <sup>1</sup>H NMR spectrum of HPTAB in CDCl<sub>3</sub>

### ESMS Spectra of **1**

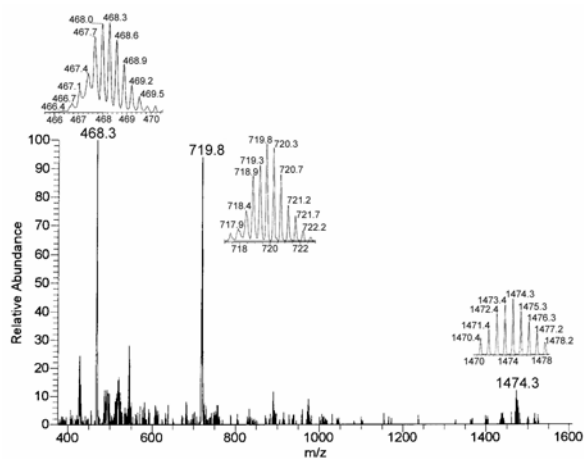

**Figure S2.** ESMS Spectra of complex **1**; the insets show the isotopic distributions for the main peaks

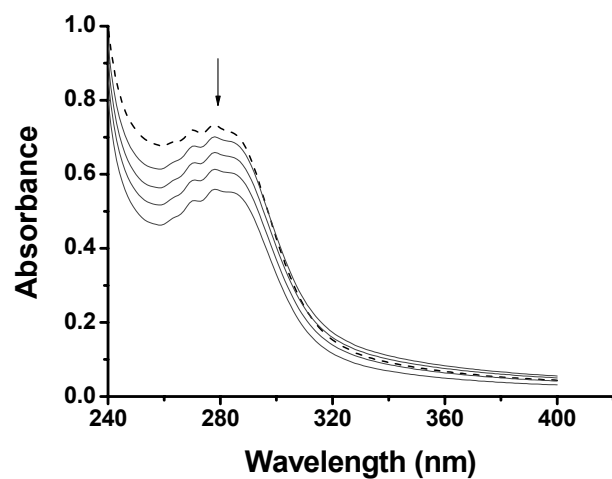

**Figure S3.** Time dependent absorbance spectra of complex **1** at  $r$  ( $[DNA]/[complex]$ ) = 0.5 (—, represent 3,6,9,12h respectively) at room temperature.

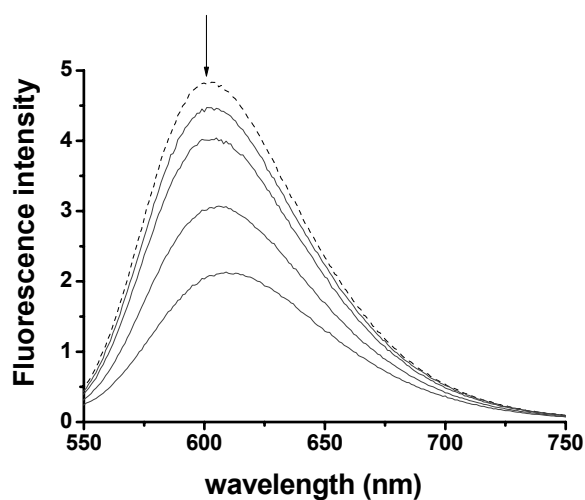

**Figure S4.** Fluorescence emission spectra (excited at 526 nm) of the EB-DNA system (50 $\mu$ M EB, 50 $\mu$ M CT-DNA) in the absence (dotted line) and presence (solid line) of **1** (3mM, 10  $\mu$ L per scan).

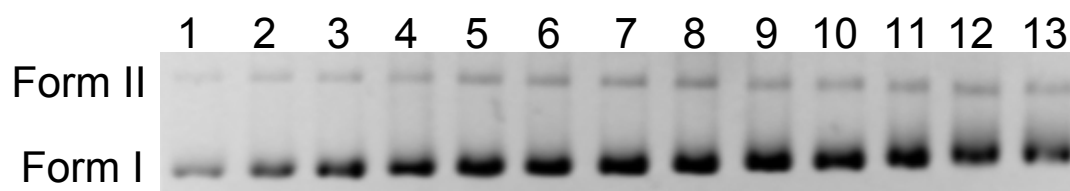

**Figure S5.** Electrophoresis in agarose gel of pUC19 plasmid DNA incubated for 24h at 37°C with cisplatin. Lane 1, control, Lane 2-13, the  $r_1$  values of 0.015, 0.03, 0.045, 0.06, 0.075, 0.09, 0.12, 0.18, 0.24, 0.30, 0.45, 0.52 respectively.

### Crystallographic Data of

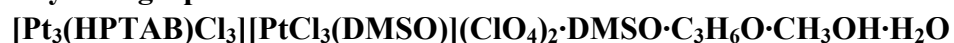

**Table S1.** Selected bond lengths (Å) and angles (°) of [Pt<sub>3</sub>(HPTAB)Cl<sub>3</sub>][PtCl<sub>3</sub>(DMSO)](ClO<sub>4</sub>)<sub>2</sub>·DMSO·C<sub>3</sub>H<sub>6</sub>O·CH<sub>3</sub>OH·H<sub>2</sub>O

|            |           |            |          |            |           |
|------------|-----------|------------|----------|------------|-----------|
| Pt1-Cl1    | 2.291(3)  | Pt1-N1     | 1.999(8) | Pt1-N2     | 2.025(10) |
| Pt1-N3     | 2.021(10) | Pt2-Cl2    | 2.289(2) | Pt2-N4     | 1.987(9)  |
| Pt2-N5     | 2.028(9)  | Pt2-N6     | 1.962(9) | Pt3-Cl3    | 2.283(2)  |
| Pt3-N7     | 2.027(8)  | Pt3-N8     | 1.986(8) | Pt3-N9     | 2.001(8)  |
| Cl1-Pt1-N1 | 177.9(2)  | N2-Pt1-N3  | 167.6(4) | Cl2-Pt2-N4 | 176.4(2)  |
| N5-Pt2-N6  | 167.9(4)  | Cl3-Pt3-N7 | 178.0(2) | N8-Pt3-N9  | 166.7(3)  |
